# Supplementary material
Source: PubMed Central journal article supplement (PMC4336154)
Supplement: DS_10.1177_0022034514555144.pdf [file DS_10.1177_0022034514555144.pdf]

## CLINICAL INVESTIGATIONS

# Predicting Severe Pain after Root Canal Therapy in the National Dental PBRN

A.S. Law<sup>1,2</sup>, D.R. Nixdorf<sup>3,4,5\*</sup>, A.M. Aguirre<sup>6</sup>, G.J. Reams<sup>7</sup>, A.J. Tortomasi<sup>8</sup>, B.D. Manne<sup>9</sup>,  
D.R. Harris<sup>10</sup>, and National Dental PBRN Collaborative Group<sup>11</sup>

Appendix

## Appendix Table.

Association of Characteristics with Severe Worst Postoperative Pain Intensity

| Characteristic                                        | Overall     | Worst Intensity of Tooth Pain in Past Week |             | P Value <sup>a</sup> |
|-------------------------------------------------------|-------------|--------------------------------------------|-------------|----------------------|
|                                                       |             | ≥7 (Severe)                                | <7          |                      |
| <b>Study Region and Practitioner Specialty Status</b> |             |                                            |             |                      |
| Dentist's training specialty                          |             |                                            |             |                      |
| General practitioner                                  | 267 (41.0)  | 58 (21.7)                                  | 209 (78.3)  | 0.23                 |
| Endodontist                                           | 385 (59.0)  | 69 (17.9)                                  | 316 (82.1)  |                      |
| Region                                                |             |                                            |             |                      |
| AL ( <i>n</i> = 98)                                   | 93 (14.3)   | 19 (20.4)                                  | 74 (79.6)   | 0.73                 |
| FL ( <i>n</i> = 131)                                  | 130 (19.9)  | 20 (15.4)                                  | 110 (84.6)  |                      |
| MN ( <i>n</i> = 390)                                  | 341 (52.3)  | 69 (20.2)                                  | 272 (79.8)  |                      |
| PDA ( <i>n</i> = 36)                                  | 35 (5.4)    | 8 (22.9)                                   | 27 (77.1)   |                      |
| SK ( <i>n</i> = 53)                                   | 53 (8.1)    | 11 (20.8)                                  | 42 (79.2)   |                      |
| <b>Demographics</b>                                   |             |                                            |             |                      |
| Age, y                                                |             |                                            |             |                      |
| Mean (SD)                                             | 48.6 (12.5) | 46.8 (11.9)                                | 49.0 (12.7) | <b>0.0766</b>        |
| Median                                                | 50.0        | 47.0                                       | 50.0        | <b>0.0619</b>        |
| Missing                                               | 11          | 0                                          | 11          |                      |
| Sex                                                   |             |                                            |             |                      |
| Male                                                  | 261 (40.5)  | 45 (17.2)                                  | 216 (82.8)  | 0.23                 |
| Female                                                | 383 (59.5)  | 82 (21.4)                                  | 301 (78.6)  |                      |
| Missing                                               | 8           | 0                                          | 8           |                      |

(continued)

DOI: 10.1177/0022034514555144. <sup>1</sup>Private Practice, The Dental Specialists, Lake Elmo, MN; <sup>2</sup>Division of Endodontics, School of Dentistry, University of Minnesota, Minneapolis, MN; <sup>3</sup>Division of TMD and Orofacial Pain, School of Dentistry, University of Minnesota, Minneapolis, MN; <sup>4</sup>Department of Neurology, Medical School, University of Minnesota, Minneapolis, MN; <sup>5</sup>HealthPartners Institute for Education and Research, Bloomington, MN; <sup>6</sup>Private Practice, Endodontic Associates, Coon Rapids, MN; <sup>7</sup>PDA Permanente Dental Associates, Tigard, OR; <sup>8</sup>Private Practice, Sumiton Dental, Sumiton, AL; <sup>9</sup>Private Practice, Ormond Beach, FL; <sup>10</sup>Westat, Rockville, MD; and <sup>11</sup>the National Dental PBRN Collaborative Group includes practitioner, faculty, and staff investigators who contributed to this activity (a complete list is at <http://nationaldentalpbrn.org>); \*corresponding author, nixdorf@umn.edu

**Appendix Table.**  
(continued)

| Characteristic              | Overall    | Worst Intensity of Tooth Pain in Past Week |            | P Value <sup>a</sup> |
|-----------------------------|------------|--------------------------------------------|------------|----------------------|
|                             |            | ≥7 (Severe)                                | <7         |                      |
| <b>Race or ethnicity</b>    |            |                                            |            |                      |
| Non-Hispanic white          | 561 (87.8) | 111 (19.8)                                 | 450 (80.2) | 0.88                 |
| Other                       | 78 (12.2)  | 16 (20.5)                                  | 62 (79.5)  |                      |
| Missing                     | 13         | 0                                          | 13         |                      |
| <b>Socioeconomic Status</b> |            |                                            |            |                      |
| <b>Household income</b>     |            |                                            |            |                      |
| ≥\$50,000                   | 408 (65.6) | 79 (19.4)                                  | 329 (80.6) |                      |
| <\$50,000                   | 214 (34.4) | 42 (19.6)                                  | 172 (80.4) |                      |
| Missing                     | 30         | 6                                          | 24         | 1.00                 |
| <b>Highest education</b>    |            |                                            |            |                      |
| College or higher           | 341 (53.0) | 72 (21.1)                                  | 269 (78.9) | 0.37                 |
| Less than college           | 303 (47.0) | 55 (18.2)                                  | 248 (81.8) |                      |
| Missing                     | 8          | 0                                          | 8          |                      |
| <b>Dental insurance</b>     |            |                                            |            |                      |
| Yes                         | 525 (81.1) | 108 (20.6)                                 | 417 (79.4) | 0.25                 |
| No                          | 122 (18.9) | 19 (15.6)                                  | 103 (84.4) |                      |
| Missing                     | 5          | 0                                          | 5          |                      |
| <b>Pain Intensity</b>       |            |                                            |            |                      |
| <b>Pain intensity now</b>   |            |                                            |            |                      |
| Mean (SD)                   | 2.7 (2.9)  | 4.3 (3.2)                                  | 2.3 (2.7)  | <0.0001              |
| Median                      | 2.0        | 4.0                                        | 1.0        | <0.0001              |
| Missing                     | 10         | 2                                          | 8          |                      |
| <b>Pain intensity now</b>   |            |                                            |            |                      |
| No pain                     | 231 (36.0) | 28 (12.1)                                  | 203 (87.9) | <0.0001              |
| Mild                        | 190 (29.6) | 23 (12.1)                                  | 167 (87.9) |                      |
| Moderate                    | 129 (20.1) | 40 (31.0)                                  | 89 (69.0)  |                      |
| Severe                      | 78 (12.1)  | 26 (33.3)                                  | 52 (66.7)  |                      |
| Most severe possible        | 14 (2.2)   | 8 (57.1)                                   | 6 (42.9)   |                      |
| Missing                     | 10         | 2                                          | 8          |                      |
| <b>Worst pain intensity</b> |            |                                            |            |                      |
| Mean (SD)                   | 5.3 (3.8)  | 6.9 (3.3)                                  | 4.9 (3.8)  | <0.0001              |
| Median                      | 7.0        | 8.0                                        | 6.0        | <0.0001              |
| Missing                     | 13         | 3                                          | 10         |                      |
| <b>Worst pain intensity</b> |            |                                            |            |                      |
| No pain                     | 154 (24.1) | 16 (10.4)                                  | 138 (89.6) | <0.0001              |
| Mild                        | 71 (11.1)  | 5 (7.0)                                    | 66 (93.0)  |                      |
| Moderate                    | 92 (14.4)  | 16 (17.4)                                  | 76 (82.6)  |                      |
| Severe                      | 226 (35.4) | 63 (27.9)                                  | 163 (72.1) |                      |
| Most severe possible        | 96 (15.0)  | 24 (25.0)                                  | 72 (75.0)  |                      |

(continued)

**Appendix Table.**  
(continued)

| Characteristic         | Overall    | Worst Intensity of Tooth Pain in Past Week |            | P Value <sup>a</sup> |
|------------------------|------------|--------------------------------------------|------------|----------------------|
|                        |            | ≥7 (Severe)                                | <7         |                      |
| Missing                | 13         | 3                                          | 10         |                      |
| Average pain intensity |            |                                            |            |                      |
| Mean (SD)              | 4.1 (3.2)  | 5.5 (3.1)                                  | 3.8 (3.2)  | <0.0001              |
| Median                 | 4.0        | 6.0                                        | 4.0        | <0.0001              |
| Missing                | 12         | 2                                          | 10         |                      |
| Average pain intensity |            |                                            |            |                      |
| No pain                | 162 (25.3) | 16 (9.9)                                   | 146 (90.1) | <0.0001              |
| Mild                   | 118 (18.4) | 17 (14.4)                                  | 101 (85.6) |                      |
| Moderate               | 185 (28.9) | 41 (22.2)                                  | 144 (77.8) |                      |
| Severe                 | 143 (22.3) | 37 (25.9)                                  | 106 (74.1) |                      |
| Most severe possible   | 32 (5.0)   | 14 (43.8)                                  | 18 (56.3)  |                      |
| Missing                | 12         | 2                                          | 10         |                      |
| <b>Pain Qualities</b>  |            |                                            |            |                      |
| Dull                   |            |                                            |            |                      |
| Yes                    | 168 (26.3) | 33 (19.6)                                  | 135 (80.4) | 1.00                 |
| No                     | 472 (73.8) | 93 (19.7)                                  | 379 (80.3) |                      |
| Missing                | 12         | 1                                          | 11         |                      |
| Sharp                  |            |                                            |            |                      |
| Yes                    | 173 (27.0) | 49 (28.3)                                  | 124 (71.7) | 0.0011               |
| No                     | 467 (73.0) | 77 (16.5)                                  | 390 (83.5) |                      |
| Missing                | 12         | 1                                          | 11         |                      |
| Aching                 |            |                                            |            |                      |
| Yes                    | 263 (41.1) | 68 (25.9)                                  | 195 (74.1) | 0.0012               |
| No                     | 377 (58.9) | 58 (15.4)                                  | 319 (84.6) |                      |
| Missing                | 12         | 1                                          | 11         |                      |
| Throbbing              |            |                                            |            |                      |
| Yes                    | 237 (37.0) | 65 (27.4)                                  | 172 (72.6) | 0.0002               |
| No                     | 403 (63.0) | 61 (15.1)                                  | 342 (84.9) |                      |
| Missing                | 12         | 1                                          | 11         |                      |
| Burning                |            |                                            |            |                      |
| Yes                    | 18 (2.8)   | 3 (16.7)                                   | 15 (83.3)  | 1.00                 |
| No                     | 622 (97.2) | 123 (19.8)                                 | 499 (80.2) |                      |
| Missing                | 12         | 1                                          | 11         |                      |
| Shooting               |            |                                            |            |                      |
| Yes                    | 128 (20.0) | 35 (27.3)                                  | 93 (72.7)  | 0.0181               |
| No                     | 512 (80.0) | 91 (17.8)                                  | 421 (82.2) |                      |
| Missing                | 12         | 1                                          | 11         |                      |
| Electric               |            |                                            |            |                      |
| Yes                    | 38 (5.9)   | 8 (21.1)                                   | 30 (78.9)  | 0.83                 |

(continued)

**Appendix Table.**  
(continued)

| Characteristic                                         | Overall    | Worst Intensity of Tooth Pain in Past Week |            | P Value <sup>a</sup> |
|--------------------------------------------------------|------------|--------------------------------------------|------------|----------------------|
|                                                        |            | ≥7 (Severe)                                | <7         |                      |
| No                                                     | 602 (94.1) | 118 (19.6)                                 | 484 (80.4) |                      |
| Missing                                                | 12         | 1                                          | 11         |                      |
| <b>Pain starts spontaneously</b>                       |            |                                            |            |                      |
| Yes                                                    | 296 (46.3) | 79 (26.7)                                  | 217 (73.3) | <b>&lt;0.0001</b>    |
| No                                                     | 343 (53.7) | 47 (13.7)                                  | 296 (86.3) |                      |
| Missing                                                | 13         | 1                                          | 12         |                      |
| <b>Pain is provoked</b>                                |            |                                            |            |                      |
| Yes                                                    | 314 (49.1) | 72 (22.9)                                  | 242 (77.1) | <b>0.0472</b>        |
| No                                                     | 325 (50.9) | 54 (16.6)                                  | 271 (83.4) |                      |
| Missing                                                | 13         | 1                                          | 12         |                      |
| <b>Pain never gets worse</b>                           |            |                                            |            |                      |
| Yes                                                    | 33 (5.1)   | 4 (12.1)                                   | 29 (87.9)  | 0.37                 |
| No                                                     | 608 (94.9) | 121 (19.9)                                 | 487 (80.1) |                      |
| Missing                                                | 11         | 2                                          | 9          |                      |
| <b>Pain gets worse by itself</b>                       |            |                                            |            |                      |
| Yes                                                    | 173 (27.0) | 40 (23.1)                                  | 133 (76.9) | 0.18                 |
| No                                                     | 468 (73.0) | 85 (18.2)                                  | 383 (81.8) |                      |
| Missing                                                | 11         | 2                                          | 9          |                      |
| <b>Biting makes pain worse</b>                         |            |                                            |            |                      |
| Yes                                                    | 312 (48.7) | 78 (25.0)                                  | 234 (75.0) | <b>0.0007</b>        |
| No                                                     | 329 (51.3) | 47 (14.3)                                  | 282 (85.7) |                      |
| Missing                                                | 11         | 2                                          | 9          |                      |
| <b>Cold or hot foods make pain worse</b>               |            |                                            |            |                      |
| Yes                                                    | 280 (43.7) | 67 (23.9)                                  | 213 (76.1) |                      |
| No                                                     | 361 (56.3) | 58 (16.1)                                  | 303 (83.9) |                      |
| Missing                                                | 11         | 2                                          | 9          | <b>0.0157</b>        |
| <b>Pain Sensitivity</b>                                |            |                                            |            |                      |
| <b>Pain for &gt;8 h/d for &gt;15 d/mo for &gt;3 mo</b> |            |                                            |            |                      |
| Yes                                                    | 123 (19.1) | 29 (23.6)                                  | 94 (76.4)  | 0.26                 |
| No                                                     | 521 (80.9) | 98 (18.8)                                  | 423 (81.2) |                      |
| Missing                                                | 8          | 0                                          | 8          |                      |
| <b>Took pain medication in past week</b>               |            |                                            |            |                      |
| Yes                                                    | 379 (59.6) | 96 (25.3)                                  | 283 (74.7) | <b>&lt;0.0001</b>    |
| No                                                     | 257 (40.4) | 31 (12.1)                                  | 226 (87.9) |                      |
| Missing                                                | 16         | 0                                          | 16         |                      |
| <b>Pain duration during the past week</b>              |            |                                            |            |                      |
| No pain                                                | 165 (25.6) | 16 (9.7)                                   | 149 (90.3) | <b>0.0009</b>        |
| 1 d of pain                                            | 30 (4.7)   | 4 (13.3)                                   | 26 (86.7)  |                      |
| 2 d of pain                                            | 43 (6.7)   | 7 (16.3)                                   | 36 (83.7)  |                      |

(continued)

**Appendix Table.**  
(continued)

| Characteristic                                                         | Worst Intensity of Tooth Pain in Past Week |             |            | P Value <sup>a</sup> |
|------------------------------------------------------------------------|--------------------------------------------|-------------|------------|----------------------|
|                                                                        | Overall                                    | ≥7 (Severe) | <7         |                      |
| 3 d of pain                                                            | 58 (9.0)                                   | 11 (19.0)   | 47 (81.0)  |                      |
| 4 d of pain                                                            | 76 (11.8)                                  | 25 (32.9)   | 51 (67.1)  |                      |
| 5 d of pain                                                            | 58 (9.0)                                   | 14 (24.1)   | 44 (75.9)  |                      |
| 6 d of pain                                                            | 26 (4.0)                                   | 4 (15.4)    | 22 (84.6)  |                      |
| 7 d of pain                                                            | 188 (29.2)                                 | 46 (24.5)   | 142 (75.5) |                      |
| Missing                                                                | 8                                          | 0           | 8          |                      |
| <b>Pain duration during the past week</b>                              |                                            |             |            |                      |
| Mean (SD)                                                              | 3.7 (2.8)                                  | 4.5 (2.4)   | 3.5 (2.8)  | <b>0.0002</b>        |
| Median                                                                 | 4.0                                        | 5.0         | 4.0        | <b>0.0003</b>        |
| Missing                                                                | 8                                          | 0           | 8          |                      |
| <b>Pain in more than 1 area of body at least 4 d each week</b>         |                                            |             |            |                      |
| Yes                                                                    | 188 (29.2)                                 | 47 (25.0)   | 141 (75.0) | <b>0.0383</b>        |
| No                                                                     | 455 (70.8)                                 | 80 (17.6)   | 375 (82.4) |                      |
| Missing                                                                | 9                                          | 0           | 9          |                      |
| <b>Pain Interference</b>                                               |                                            |             |            |                      |
| <b>Number of missed days</b>                                           |                                            |             |            |                      |
| No days away from activities                                           | 515 (80.3)                                 | 78 (15.1)   | 437 (84.9) | <b>&lt;0.0001</b>    |
| 1 d away from activities                                               | 38 (5.9)                                   | 11 (28.9)   | 27 (71.1)  |                      |
| 2 d away from activities                                               | 38 (5.9)                                   | 18 (47.4)   | 20 (52.6)  |                      |
| 3 d away from activities                                               | 22 (3.4)                                   | 6 (27.3)    | 16 (72.7)  |                      |
| 4 d away from activities                                               | 12 (1.9)                                   | 4 (33.3)    | 8 (66.7)   |                      |
| 5 d away from activities                                               | 8 (1.2)                                    | 4 (50.0)    | 4 (50.0)   |                      |
| 6 d away from activities                                               | 3 (0.5)                                    | 1 (33.3)    | 2 (66.7)   |                      |
| 7 d away from activities                                               | 5 (0.8)                                    | 4 (80.0)    | 1 (20.0)   |                      |
| Missing                                                                | 11                                         | 1           | 10         |                      |
| <b>Number of days when patient missed usual activities due to pain</b> |                                            |             |            |                      |
| Mean (SD)                                                              | 0.5 (1.2)                                  | 1.1 (1.8)   | 0.4 (1.0)  | <b>&lt;0.0001</b>    |
| Median                                                                 | 0.0                                        | 0.0         | 0.0        | <b>&lt;0.0001</b>    |
| Missing                                                                | 11                                         | 1           | 10         |                      |
| <b>Tooth pain interference with usual activities</b>                   |                                            |             |            |                      |
| Mean (SD)                                                              | 1.8 (2.6)                                  | 3.0 (3.0)   | 1.5 (2.4)  | <b>&lt;0.0001</b>    |
| Median                                                                 | 0.0                                        | 2.0         | 0.0        | <b>&lt;0.0001</b>    |
| Missing                                                                | 9                                          | 1           | 8          |                      |
| <b>Tooth pain interference with recreational activities</b>            |                                            |             |            |                      |
| Mean (SD)                                                              | 1.5 (2.6)                                  | 2.9 (3.2)   | 1.2 (2.3)  | <b>&lt;0.0001</b>    |
| Median                                                                 | 0.0                                        | 1.0         | 0.0        | <b>&lt;0.0001</b>    |
| Missing                                                                | 9                                          | 0           | 9          |                      |

(continued)

**Appendix Table.**  
(continued)

| Characteristic                                                 | Overall    | Worst Intensity of Tooth Pain in Past Week |            | P Value <sup>a</sup> |
|----------------------------------------------------------------|------------|--------------------------------------------|------------|----------------------|
|                                                                |            | ≥7 (Severe)                                | <7         |                      |
| <b>Tooth pain interference with work</b>                       |            |                                            |            |                      |
| Mean (SD)                                                      | 1.4 (2.5)  | 2.5 (2.9)                                  | 1.2 (2.2)  | <0.0001              |
| Median                                                         | 0.0        | 1.0                                        | 0.0        | <0.0001              |
| Missing                                                        | 10         | 1                                          | 9          |                      |
| <b>Combined interference scale<sup>b</sup> (highest score)</b> |            |                                            |            |                      |
| Mean (SD)                                                      | 1.9 (2.8)  | 3.4 (3.3)                                  | 1.6 (2.5)  | <0.0001              |
| Median                                                         | 0.0        | 3.0                                        | 0.0        | <0.0001              |
| Missing                                                        | 5          | 0                                          | 5          |                      |
| <b>Combined interference scale<sup>b</sup> (mean score)</b>    |            |                                            |            |                      |
| Mean (SD)                                                      | 1.6 (2.5)  | 2.8 (2.9)                                  | 1.3 (2.2)  | <0.0001              |
| Median                                                         | 0.0        | 1.7                                        | 0.0        | <0.0001              |
| Missing                                                        | 14         | 2                                          | 12         |                      |
| <b>Psychosocial Characteristics</b>                            |            |                                            |            |                      |
| <b>Pain made worse with stress</b>                             |            |                                            |            |                      |
| Yes                                                            | 43 (6.7)   | 18 (41.9)                                  | 25 (58.1)  | 0.0005               |
| No                                                             | 598 (93.3) | 107 (17.9)                                 | 491 (82.1) |                      |
| Missing                                                        | 11         | 2                                          | 9          |                      |
| <b>Fear about appointment</b>                                  |            |                                            |            |                      |
| Not at all                                                     | 235 (36.3) | 44 (18.7)                                  | 191 (81.3) | 0.49                 |
| A little                                                       | 293 (45.2) | 61 (20.8)                                  | 232 (79.2) |                      |
| Quite a lot                                                    | 62 (9.6)   | 8 (12.9)                                   | 54 (87.1)  |                      |
| Very much                                                      | 58 (9.0)   | 13 (22.4)                                  | 45 (77.6)  |                      |
| Missing                                                        | 4          | 1                                          | 3          |                      |
| <b>Fear (binary)</b>                                           |            |                                            |            |                      |
| Quite a lot or very much                                       | 120 (18.5) | 21 (17.5)                                  | 99 (82.5)  | 0.61                 |
| A little or not at all                                         | 528 (81.5) | 105 (19.9)                                 | 423 (80.1) |                      |
| Missing                                                        | 4          | 1                                          | 3          |                      |
| <b>Expected treatment outcome</b>                              |            |                                            |            |                      |
| Very good                                                      | 426 (65.6) | 84 (19.7)                                  | 342 (80.3) | 0.90                 |
| Good                                                           | 207 (31.9) | 41 (19.8)                                  | 166 (80.2) |                      |
| Fair                                                           | 16 (2.5)   | 2 (12.5)                                   | 14 (87.5)  |                      |
| Poor                                                           | 0          | 0                                          | 0          |                      |
| Missing                                                        | 3          | 0                                          | 3          |                      |
| <b>Expected treatment outcome</b>                              |            |                                            |            |                      |
| Very good                                                      | 426 (65.6) | 84 (19.7)                                  | 342 (80.3) | 0.92                 |
| Good or fair                                                   | 223 (34.4) | 43 (19.3)                                  | 180 (80.7) |                      |
| Missing                                                        | 3          | 0                                          | 3          |                      |

(continued)

**Appendix Table.**  
(continued)

| Characteristic                                                  | Overall    | Worst Intensity of Tooth Pain in Past Week |            | P Value <sup>a</sup> |
|-----------------------------------------------------------------|------------|--------------------------------------------|------------|----------------------|
|                                                                 |            | ≥7 (Severe)                                | <7         |                      |
| <b>Systemic Health Characteristics</b>                          |            |                                            |            |                      |
| Smoked ≥100 cigarettes in lifetime                              |            |                                            |            |                      |
| Yes                                                             | 305 (47.4) | 59 (19.3)                                  | 246 (80.7) | 0.84                 |
| No                                                              | 339 (52.6) | 68 (20.1)                                  | 271 (79.9) |                      |
| Missing                                                         | 8          | 0                                          | 8          |                      |
| Currently smoke cigarettes                                      |            |                                            |            |                      |
| Yes                                                             | 100 (15.5) | 20 (20.0)                                  | 80 (80.0)  | 1.00                 |
| No                                                              | 544 (84.5) | 107 (19.7)                                 | 437 (80.3) |                      |
| Missing                                                         | 8          | 0                                          | 8          |                      |
| On average, how many cigarettes smoked per day?                 |            |                                            |            |                      |
| Mean (SD)                                                       | 5.7 (8.9)  | 5.9 (9.6)                                  | 5.7 (8.7)  | 0.87                 |
| Median                                                          | 0.0        | 0.0                                        | 0.0        | 0.93                 |
| Missing                                                         | 8          | 0                                          | 8          |                      |
| Doctor ever told you that you have diabetes or high blood sugar |            |                                            |            |                      |
| Yes                                                             | 82 (12.9)  | 18 (22.0)                                  | 64 (78.0)  | 0.66                 |
| No                                                              | 553 (87.1) | 109 (19.7)                                 | 444 (80.3) |                      |
| Missing                                                         | 17         | 0                                          | 17         |                      |
| <b>Pulpal Diagnoses</b>                                         |            |                                            |            |                      |
| Necrotic pulp                                                   |            |                                            |            |                      |
| Yes                                                             | 346 (53.6) | 60 (17.3)                                  | 286 (82.7) | 0.16                 |
| No                                                              | 300 (46.4) | 66 (22.0)                                  | 234 (78.0) |                      |
| Missing                                                         | 6          | 1                                          | 5          |                      |
| Normal or asymptomatic pulpitis                                 |            |                                            |            |                      |
| Yes                                                             | 64 (9.9)   | 14 (21.9)                                  | 50 (78.1)  | 0.62                 |
| No                                                              | 582 (90.1) | 112 (19.2)                                 | 470 (80.8) |                      |
| Missing                                                         | 6          | 1                                          | 5          |                      |
| Symptomatic irreversible pulpitis                               |            |                                            |            |                      |
| Yes                                                             | 236 (36.5) | 52 (22.0)                                  | 184 (78.0) | 0.22                 |
| No                                                              | 410 (63.5) | 74 (18.0)                                  | 336 (82.0) |                      |
| Missing                                                         | 6          | 1                                          | 5          |                      |
| <b>Apical Diagnoses</b>                                         |            |                                            |            |                      |
| Normal apical tissue                                            |            |                                            |            |                      |
| Yes                                                             | 151 (24.5) | 20 (13.2)                                  | 131 (86.8) | <b>0.0545</b>        |
| No                                                              | 466 (75.5) | 95 (20.4)                                  | 371 (79.6) |                      |
| Missing                                                         | 35         | 12                                         | 23         |                      |
| Symptomatic apical periodontitis                                |            |                                            |            |                      |
| Yes                                                             | 335 (54.3) | 82 (24.5)                                  | 253 (75.5) | <b>&lt;0.0001</b>    |

(continued)

**Appendix Table.**

(continued)

| Characteristic                           | Overall    | Worst Intensity of Tooth Pain in Past Week |            | P Value <sup>a</sup> |
|------------------------------------------|------------|--------------------------------------------|------------|----------------------|
|                                          |            | ≥7 (Severe)                                | <7         |                      |
| No                                       | 282 (45.7) | 33 (11.7)                                  | 249 (88.3) |                      |
| Missing                                  | 35         | 12                                         | 23         |                      |
| <b>Asymptomatic apical periodontitis</b> |            |                                            |            |                      |
| Yes                                      | 36 (5.8)   | 4 (11.1)                                   | 32 (88.9)  |                      |
| No                                       | 581 (94.2) | 111 (19.1)                                 | 470 (80.9) |                      |
| Missing                                  | 35         | 12                                         | 23         | 0.28                 |
| <b>Acute apical abscess</b>              |            |                                            |            |                      |
| Yes                                      | 42 (6.8)   | 6 (14.3)                                   | 36 (85.7)  | 0.54                 |
| No                                       | 575 (93.2) | 109 (19.0)                                 | 466 (81.0) |                      |
| Missing                                  | 35         | 12                                         | 23         |                      |
| <b>Chronic apical abscess</b>            |            |                                            |            |                      |
| Yes                                      | 53 (8.6)   | 3 (5.7)                                    | 50 (94.3)  | <b>0.0090</b>        |
| No                                       | 564 (91.4) | 112 (19.9)                                 | 452 (80.1) |                      |
| Missing                                  | 35         | 12                                         | 23         |                      |
| <b>Tooth Characteristics</b>             |            |                                            |            |                      |
| <b>Apical radiolucency exhibited</b>     |            |                                            |            |                      |
| Yes                                      | 275 (42.6) | 46 (16.7)                                  | 229 (83.3) | 0.16                 |
| No                                       | 370 (57.4) | 79 (21.4)                                  | 291 (78.6) |                      |
| Missing                                  | 7          | 2                                          | 5          |                      |
| <b>Tooth tender to percussion</b>        |            |                                            |            |                      |
| Yes                                      | 425 (65.3) | 98 (23.1)                                  | 327 (76.9) | <b>0.0018</b>        |
| No                                       | 226 (34.7) | 29 (12.8)                                  | 197 (87.2) |                      |
| Missing                                  | 1          | 0                                          | 1          |                      |
| <b>Tooth tender to biting pressure</b>   |            |                                            |            |                      |
| Yes                                      | 395 (60.8) | 94 (23.8)                                  | 301 (76.2) | <b>0.0006</b>        |
| No                                       | 255 (39.2) | 33 (12.9)                                  | 222 (87.1) |                      |
| Missing                                  | 2          | 0                                          | 2          |                      |
| <b>Tooth responds to cold testing</b>    |            |                                            |            |                      |
| Yes                                      | 296 (45.7) | 73 (24.7)                                  | 223 (75.3) | <b>0.0039</b>        |
| No                                       | 351 (54.3) | 54 (15.4)                                  | 297 (84.6) |                      |
| Missing                                  | 5          | 0                                          | 5          |                      |
| <b>Prolonged response to cold</b>        |            |                                            |            |                      |
| Yes                                      | 230 (35.6) | 57 (24.8)                                  | 173 (75.2) | <b>0.0174</b>        |
| No                                       | 416 (64.4) | 70 (16.8)                                  | 346 (83.2) |                      |
| Missing                                  | 6          | 0                                          | 6          |                      |
| <b>Deepest probing depth for tooth</b>   |            |                                            |            |                      |
| Mean (SD)                                | 3.5 (1.4)  | 3.4 (1.2)                                  | 3.5 (1.5)  | 0.36                 |
| Median                                   | 3.0        | 3.0                                        | 3.0        | 0.51                 |

(continued)

**Appendix Table.**

(continued)

| Characteristic                             | Overall    | Worst Intensity of Tooth Pain in Past Week |            | P Value <sup>a</sup> |
|--------------------------------------------|------------|--------------------------------------------|------------|----------------------|
|                                            |            | ≥7 (Severe)                                | <7         |                      |
| Missing                                    | 1          | 0                                          | 1          |                      |
| Draining sinus tract associated with tooth |            |                                            |            |                      |
| Yes                                        | 54 (8.5)   | 3 (5.6)                                    | 51 (94.4)  | <b>0.0039</b>        |
| No                                         | 583 (91.5) | 124 (21.3)                                 | 459 (78.7) |                      |
| Missing                                    | 15         | 0                                          | 15         |                      |
| Bleeding within pulp chamber               |            |                                            |            |                      |
| Yes                                        | 331 (50.8) | 69 (20.8)                                  | 262 (79.2) | 0.38                 |
| No                                         | 321 (49.2) | 58 (18.1)                                  | 263 (81.9) |                      |
| Swelling associated with tooth             |            |                                            |            |                      |
| Yes                                        | 64 (10.0)  | 8 (12.5)                                   | 56 (87.5)  | 0.14                 |
| No                                         | 575 (90.0) | 119 (20.7)                                 | 456 (79.3) |                      |
| Missing                                    | 13         | 0                                          | 13         |                      |
| Maxillary tooth                            |            |                                            |            |                      |
| Yes                                        | 389 (59.7) | 67 (17.2)                                  | 322 (82.8) | <b>0.0867</b>        |
| No                                         | 263 (40.3) | 60 (22.8)                                  | 203 (77.2) |                      |
| Posterior tooth                            |            |                                            |            |                      |
| Yes                                        | 582 (89.3) | 114 (19.6)                                 | 468 (80.4) | 1.0                  |
| No                                         | 70 (10.7)  | 13 (18.6)                                  | 57 (81.4)  |                      |

<sup>a</sup>The *P* values for associations of continuous-scaled measures with severe worst postoperative pain were obtained from the Student's *t* test (first *P* value) and the nonparametric Wilcoxon rank sum test (second *P* value). The *P* values for associations with categorical-scaled measures were obtained from the Fisher's exact test; the Fisher–Freeman–Halton test, an extension to the Fisher's exact test, was used when there were more than 2 levels for the characteristic. Boldface indicates statistical significance ( $P < 0.05$ ).

<sup>b</sup>The variable included pain interference with usual activities, interference with recreational activities, and interference with work.
